# Supplementary material for: The impact of comorbidity on mortality in Danish sarcoma patients from 2000-2013: A nationwide population-based multicentre study
Source: PubMed Central journal article supplement (PMC5995448; doi:10.1371/journal.pone.0198933), 2018-06-11
Supplement: pone.0198933.s001.pdf [file pone.0198933.s001.pdf]

**S1 table: ICD-8 and ICD-10 codes used to calculate the Charlson Comorbidity Index and matching scores for the 19 medical conditions. The medical conditions are divided in comorbidity categories.**

| <b>Comorbidity category:</b>     |                                                                      |                                                                                |            |
|----------------------------------|----------------------------------------------------------------------|--------------------------------------------------------------------------------|------------|
| Conditions:                      | ICD-8:                                                               | ICD-10:                                                                        | CCI-Score: |
| <b>Cardiopulmonary disease:</b>  |                                                                      |                                                                                |            |
| Myocardial infarction            | 410                                                                  | I21; I22; I23                                                                  | 1          |
| Congestive heart failure         | 427.09; 427.10; 427.11;<br>427.19; 428.99; 782.49                    | I50; I11.0; I13.0; I13.2                                                       | 1          |
| Chronic pulmonary disease        | 490-493; 515-518                                                     | J40-J47; J60-J67; J68.4;<br>J70.1; J70.3; J84.1; J92.0;<br>J96.1; J98.2; J98.3 | 1          |
| <b>Gastrointestinal disease:</b> |                                                                      |                                                                                |            |
| Ulcer disease                    | 530.91; 530.98; 531-534                                              | K22.1; K25-K28                                                                 | 1          |
| Mild liver disease               | 571; 573.01; 573.04                                                  | B18; K70.0-K70.3; K70.9;<br>K71; K73; K74; K76.0                               | 1          |
| Moderate/severe liver disease    | 070.00; 070.02; 070.04;<br>070.06; 070.08; 456.00-<br>456.09; 573.00 | B15.0; B16.0; B16.2; B19.0;<br>K70.4; K72; K76.6; I85                          | 3          |
| <b>Neurovascular disease:</b>    |                                                                      |                                                                                |            |
| Peripheral vascular disease      | 440-445                                                              | I70; I71; I72; I73; I74; I77                                                   | 1          |
| Cerebrovascular disease          | 430-438                                                              | I60-I69; G45; G46                                                              | 1          |
| Dementia                         | 290.09-290.19; 293.09                                                | F00-F03; F05.1; G30                                                            | 1          |
| Hemiplegia                       | 344                                                                  | G81; G82                                                                       | 2          |
| <b>Malignant neoplasm:</b>       |                                                                      |                                                                                |            |
| Any tumour*                      | 140-169; 172-192.48;<br>193-194                                      | C00-C39; C42-C46; C48;<br>C50-C75                                              | 2          |
| Leukaemia                        | 204-207                                                              | C91-C95                                                                        | 2          |
| Lymphoma                         | 200-203; 275.59                                                      | C81-C85; C88; C90; C96                                                         | 2          |
| Metastatic solid tumour          | 195-199                                                              | C76-C80                                                                        | 6          |
| <b>Miscellaneous diseases:</b>   |                                                                      |                                                                                |            |
| Connective tissue disease        | 135.99; 446; 712; 716; 734                                           | M05; M06; M08; M09; M30;<br>M31; M32; M33; M34; M35;<br>M36; D86               | 1          |
| Diabetes                         | 249.00; 249.06; 249.07;<br>249.09; 250.00; 250.06;<br>250.07; 250.09 | E10.0, E10.1; E10.9; E11.0;<br>E11.1; E11.9                                    | 1          |
| Moderate/severe renal disease    | 403; 404; 580-583; 584;<br>590.09; 593.19; 753.10-<br>753.19; 792    | I12; I13; N00-N05; N07;<br>N11; N14; N17-N19; Q61                              | 2          |
| Diabetes with end organ damage   | 249.01-249.05; 249.08;<br>250.01-250.05; 250.08                      | E10.2-E10.8; E11.2-E11.8                                                       | 2          |
| AIDS                             | 079.83                                                               | B21-B24                                                                        | 6          |

ICD: international Classification of Disease (version 8 and 10); CCI: Charlson Comorbidity Index; AIDS: acquired immunodeficiency syndrome.

\* Excluding tumours in soft tissue and bone (iCD-8; 170, 171, 192.49-99 and iCD-10; C40-C41, C47, C49).
