# Supplementary material for: The impact of comorbidity on mortality in Danish sarcoma patients from 2000-2013: A nationwide population-based multicentre study
Source: PubMed Central journal article supplement (PMC5995448; doi:10.1371/journal.pone.0198933), 2018-06-11
Supplement: pone.0198933.s002.pdf [file pone.0198933.s002.pdf]

**S1 fig: Directed acyclic graph of possible relationship between important covariates and mortality in sarcoma patients.**

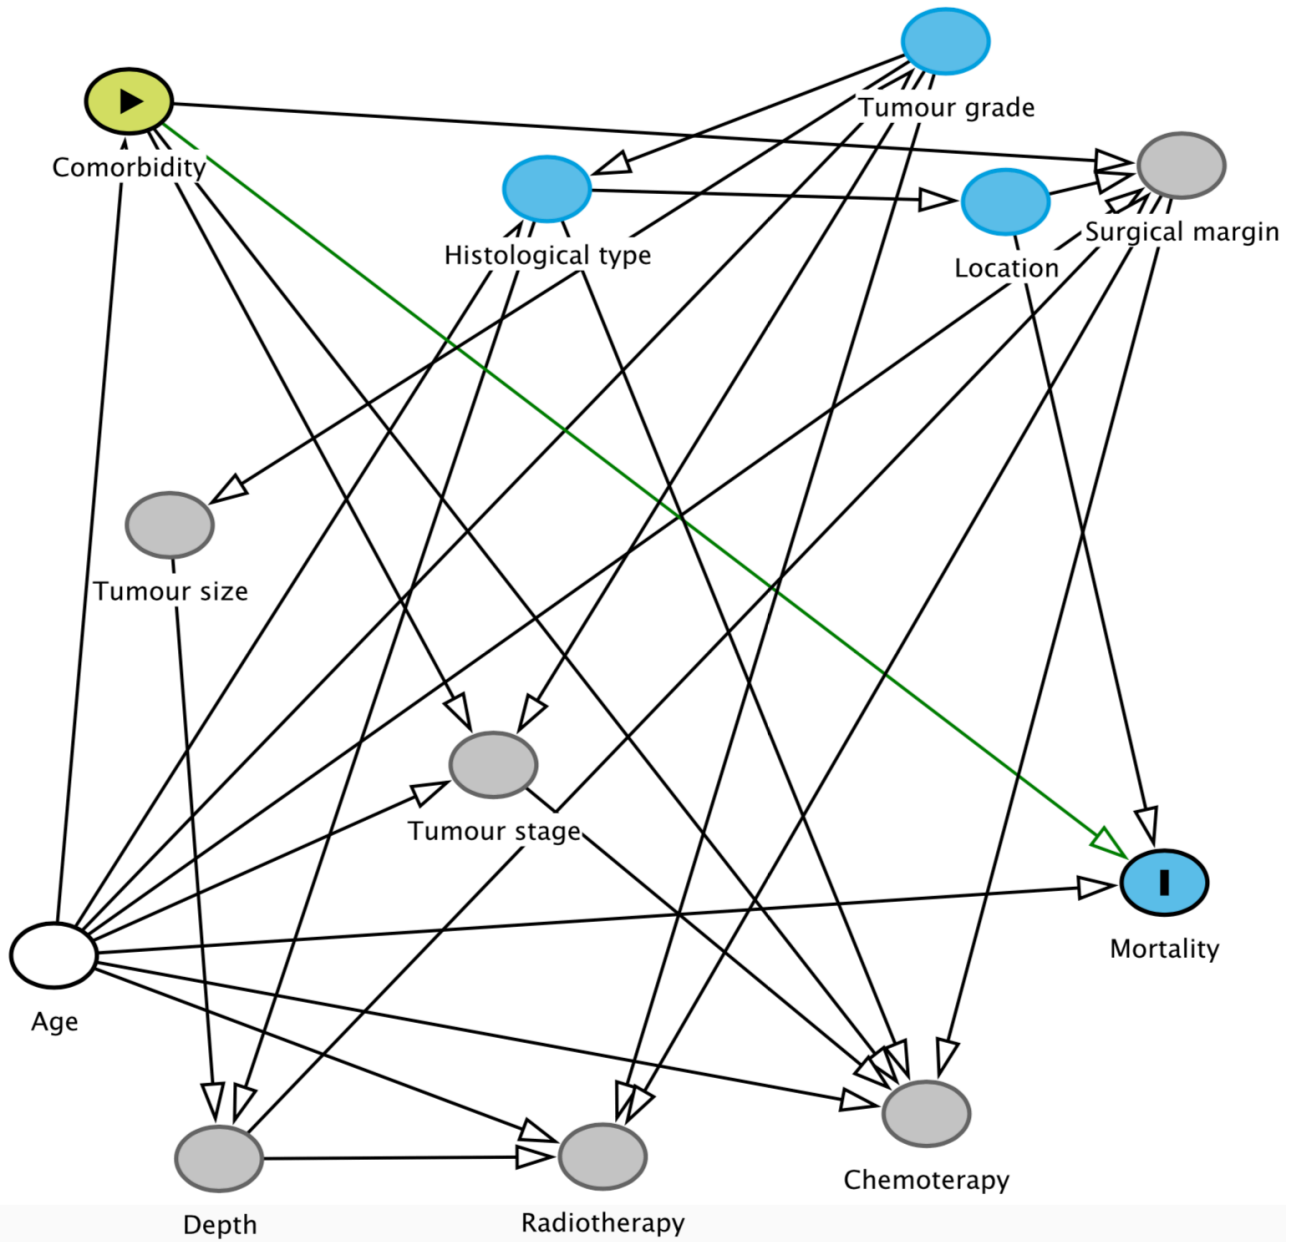

Exposure: Comorbidity  
 Outcome: Death  
 Adjusted variable: Age
